# Supplementary material
Source: PubMed Central journal article supplement (PMC6097943)
Supplement: NIHMS948700-supplement.pdf [file NIHMS948700-supplement.pdf]

# **CSF $\alpha$ -synuclein contributes to the differential diagnosis of Alzheimer disease - Supplementary Materials**

Min Shi, Lu Tang, Jon B. Toledo, Carmen Gingham, Hua Wang, Patrick Aro, Poul H. Jensen, Daniel Weintraub, Alice Chen-Plotkin, David Irwin, Murray Grossman, Leo McCluskey, Lauren B. Elman, David A. Wolk, Edward B. Lee, Leslie M. Shaw, John Q. Trojanowski, Jing Zhang

## **I. Supplementary Methods**

### **Tissue collection and neuropathological assessment**

Tissue collection procedures have been previously described [1]. Briefly, with the routine diagnostic procedure the sections were stained with hematoxylin-eosin, in order to quantify neuron loss and gliosis the following primary antibodies were used for the detection of abnormal proteins: nab228 [monoclonal antibody (mAb), 1:8,000, generated in the Center for Neurodegenerative Disease Research (CNDR) at the University of Pennsylvania] [2] to detect amyloid deposits and Thal staging [3], phosphorylated tau PHF-1 (mAb, 1:1,000, a gift of Dr. Peter Davies) to detect phosphorylated tau deposits, pS409/410 (mAb, 1:500, a gift of Dr. Manuela Neumann) to detect phosphorylated TDP43 deposits [4], and Syn303 (mAb, 1:16,000, generated in the CNDR) to detect the presence of oxidized/nitrated  $\alpha$ -syn [5]. Primary antibody binding was visualized with the avidin–biotin complex detection method (VECTASTAIN ABC kit; Vector Laboratories, Burlingame, CA, USA) with ImmPACT diaminobenzidine peroxidase substrate (Vector Laboratories, Burlingame, CA, USA) as the chromogen. In addition, Thioflavin S was used to grade the presence of neuritic plaques and Consortium to Establish a Registry for Alzheimer’s disease (CERAD) score [6, 7]. All changes were rated using a semi-quantitative scale (0 = no changes, 0.5 = rare, 1 = mild, 2 = moderate and 3 = severe), and these gradings were entered in the Integrated Neurodegenerative Disease Database (INDD) established in the CNDR. All cases were reviewed by a board-certified neuropathologist for quality assurance and accurate grading. Briefly, neurofibrillary tangles and senile plaques were graded according to NIA-Reagan criteria using Braak staging [8, 9] and the CERAD protocol, without considering subject age [6]. A neuropathological diagnosis of Alzheimer disease (AD) was assigned if the probability was intermediate or high [10]. The diagnoses of frontotemporal lobar degeneration (FTLD)-TAU, FTLD-TDP and dementia with Lewy bodies (DLB) were based on established criteria [11, 12]. FTLD-TAU cases included cases with a diagnosis of argyrophilic grain disease (AGD), progressive supranuclear palsy (PSP), tangle predominant senile dementia (TPSD), and corticobasal degeneration (CBD).

## References

- [1] Toledo JB, Van Deerlin VM, Lee EB, Suh E, Baek Y, Robinson JL, et al. A platform for discovery: The University of Pennsylvania Integrated Neurodegenerative Disease Biobank. *Alzheimers Dement.* 2014;10:477-84 e1.
- [2] Lee EB, Skovronsky DM, Abtahian F, Doms RW, Lee VM. Secretion and intracellular generation of truncated A $\beta$  in beta-site amyloid-beta precursor protein-cleaving enzyme expressing human neurons. *J Biol Chem.* 2003;278:4458-66.
- [3] Thal DR, Rub U, Orantes M, Braak H. Phases of A $\beta$  deposition in the human brain and its relevance for the development of AD. *Neurology.* 2002;58:1791-800.
- [4] Neumann M, Sampathu DM, Kwong LK, Truax AC, Micsenyi MC, Chou TT, et al. Ubiquitinated TDP-43 in frontotemporal lobar degeneration and amyotrophic lateral sclerosis. *Science.* 2006;314:130-3.
- [5] Duda JE, Giasson BI, Mabon ME, Lee VM, Trojanowski JQ. Novel antibodies to synuclein show abundant striatal pathology in Lewy body diseases. *Ann Neurol.* 2002;52:205-10.
- [6] Mirra SS, Heyman A, McKeel D, Sumi SM, Crain BJ, Brownlee LM, et al. The Consortium to Establish a Registry for Alzheimer's Disease (CERAD). Part II. Standardization of the neuropathologic assessment of Alzheimer's disease. *Neurology.* 1991;41:479-86.
- [7] Mirra SS. The CERAD neuropathology protocol and consensus recommendations for the postmortem diagnosis of Alzheimer's disease: a commentary. *Neurobiol Aging.* 1997;18:S91-4.
- [8] Braak H, Braak E. Neuropathological stageing of Alzheimer-related changes. *Acta Neuropathol.* 1991;82:239-59.
- [9] Braak H, Alafuzoff I, Arzberger T, Kretschmar H, Del Tredici K. Staging of Alzheimer disease-associated neurofibrillary pathology using paraffin sections and immunocytochemistry. *Acta Neuropathol.* 2006;112:389-404.
- [10] Hyman BT, Trojanowski JQ. Consensus recommendations for the postmortem diagnosis of Alzheimer disease from the National Institute on Aging and the Reagan Institute Working Group on diagnostic criteria for the neuropathological assessment of Alzheimer disease. *J Neuropathol Exp Neurol.* 1997;56:1095-7.
- [11] Mackenzie I, Neumann M, Bigio E, Cairns N, Alafuzoff I, Kril J, et al. Nomenclature and nosology for neuropathologic subtypes of frontotemporal lobar degeneration: an update. *Acta Neuropathol.* 2010;119:1-4.
- [12] McKeith IG, Dickson DW, Lowe J, Emre M, O'Brien JT, Feldman H, et al. Diagnosis and management of dementia with Lewy bodies: third report of the DLB Consortium. *Neurology.* 2005;65:1863-72.

## II. Supplementary Tables

**Supplementary Table 1.** Characteristics of the whole clinical cohort.

|                                                     | HC                            | AD                          | MCI                             | FTD                                  | CBS                           | DLB                           | PD                            | ALS                        | PSP                        |
|-----------------------------------------------------|-------------------------------|-----------------------------|---------------------------------|--------------------------------------|-------------------------------|-------------------------------|-------------------------------|----------------------------|----------------------------|
| <b>N</b>                                            | 69                            | 165                         | 105                             | 60                                   | 10                            | 16                            | 63                            | 41                         | 11                         |
| <b>Age at CSF sampling</b>                          | 68<br>[(61)-<br>(74)]         | 72<br>[(63)-<br>(78)]       | 72<br>[(65)-<br>(76)]           | 64<br>[(56)-<br>(67)]                | 67<br>[(62)-<br>(73)]         | 67.5<br>[(64.5)-<br>(74.5)]   | 66<br>[(61.5)-<br>(72)]       | 56<br>[(50)-<br>(66)]      | 71<br>[(63)-<br>(74)]      |
| <b>Sex (% male)</b>                                 | 36.2                          | 40                          | 49.5                            | 61.7                                 | 50                            | 50                            | 79.4                          | 78                         | 54.5                       |
| <b>Disease duration at CSF (yr)</b>                 | -                             | 2<br>[(1)-(4)]              | 2<br>[(1)-(3)]                  | 2<br>[(1)-(4)]                       | 2<br>[(1)-(2)]                | 2<br>[(1)-(3)]                | 7<br>[(4)-(11)]               | 1<br>[(0)-(1)]             | 2<br>[(2)-(4.5)]           |
| <b>APOE <math>\epsilon</math>4 presence (%)</b>     | 31.2                          | 63.2                        | 44.8                            | 32.2                                 | 20                            | 30                            | 28.1                          | 21.1                       | 9.1                        |
| <b>CSF A<math>\beta</math><sub>42</sub> (pg/mL)</b> | 244.0<br>[(202)-<br>(286.21)] | 140.6<br>[(112)-<br>(163)]  | 183.0<br>[(122.81)<br>-(228.1)] | 196.8<br>[(147.12)<br>-<br>(289.12)] | 232.0<br>[(214.75)<br>-(292)] | 156.5<br>[(138)-<br>(182.49)] | 231.8<br>[(180)-<br>(269.36)] | 276.0<br>[(219)-<br>(318)] | 181<br>[(140.5)-<br>(223)] |
| <b>CSF t-tau (pg/mL)</b>                            | 49.6<br>[(36.5)-<br>(62.59)]  | 95<br>[(70.28)-<br>(145)]   | 71.8<br>[(43.5)-<br>(104.95)]   | 62.0<br>[(43.64)-<br>(87.25)]        | 69<br>[(62)-<br>(93.25)]      | 70.9<br>[(45.75)-<br>(97.96)] | 39.0<br>[(29)-<br>(54.92)]    | 55<br>[(39)-<br>(67)]      | 43.0<br>[(34)-<br>(53)]    |
| <b>CSF p-tau (pg/mL)</b>                            | 18<br>[(14.0)-<br>(24.7)]     | 35.4<br>[(23.1)-<br>(51.2)] | 24<br>[(13.9)-<br>(48.8)]       | 17<br>[(12)-<br>(25.5)]              | 19.5<br>[(16.5)-<br>(23.8)]   | 24.29<br>[(16.0)-<br>(39.0)]  | 20<br>[(15)-<br>(27.0)]       | 11<br>[(8.0)-<br>(14.0)]   | 14<br>[(12.5)-<br>(19.5)]  |

Data shown is median [(25<sup>th</sup> percentile)-(75<sup>th</sup> percentile)], except for Sex of subject and APOE  $\epsilon$ 4 presence. AD, Alzheimer disease; ALS, amyotrophic lateral sclerosis; bvFTD, behavioral variant (social/executive) FTD; CBS, corticobasal syndrome; DLB, dementia with Lewy bodies; FTD, frontotemporal degeneration; HC, healthy control; LBD, Lewy body disorders; MCI, mild cognitive impairment; PD, Parkinson disease; PSP, progressive supranuclear palsy.

**Supplementary Table 2.** Characteristics of the whole autopsy cohort.

|                                    | AD                            | FTLD                           | FTLD-AD                         | PD                               | PD-AD                           | LRP-AD                          | LRP-TDP                          | ALS                              | HC                           |
|------------------------------------|-------------------------------|--------------------------------|---------------------------------|----------------------------------|---------------------------------|---------------------------------|----------------------------------|----------------------------------|------------------------------|
| <b>N</b>                           | 40                            | 17                             | 6                               | 3                                | 4                               | 21                              | 2                                | 6                                | 3                            |
| <b>Age at CSF sampling</b>         | 75<br>[(64)-<br>(79.5)]       | 71.0<br>[(64.0)-<br>(72.0)]    | 66<br>[(58.75)-<br>(68.75)]     | 77<br>[(77)-<br>(82.5)]          | 73<br>[(66.25)-<br>(80.25)]     | 72<br>[(62)-<br>(76)]           | 63.5<br>[(61.25)-<br>(65.75)]    | 57<br>[(54.25)-<br>(61.25)]      | 80<br>[(78)-<br>(86.5)]      |
| <b>Sex (% male)</b>                | 60                            | 52.9                           | 83.3                            | 66.7                             | 100                             | 52.4                            | 50                               | 16.7                             | 66.7                         |
| <b>Disease duration at CSF</b>     | 3<br>[(1)-<br>(4.25)]         | 2.5<br>[(1.0)-<br>(5.3)]       | 3<br>[(2.25)-<br>(3.75)]        | 17<br>[(14)-<br>(18.5)]          | 6.5<br>[(5)-(7)]                | 4<br>[(3)-(4)]                  | 1.5<br>[(1.25)-<br>(1.75)]       | 1<br>[(1)-(1)]                   | -                            |
| <b>Age at Death</b>                | 79<br>[(70)-<br>(85.25)]      | 73.0<br>[(68.0)-<br>(76.0)]    | 70.5<br>[(60.5)-<br>(73.75)]    | 80<br>[(79.5)-<br>(84.5)]        | 76.5<br>[(70.75)-<br>(83)]      | 75<br>[(68)-<br>(85)]           | 69<br>[(67)-<br>(71)]            | 59<br>[(56.25)-<br>(61.75)]      | 86<br>[(83)-<br>(93.5)]      |
| <b>Survival after CSF</b>          | 5.2<br>[(3.5)-<br>(6.6)]      | 3.7<br>[(2.1)-<br>(5.6)]       | 4.4<br>[(2.9)-<br>(5.07)]       | 1.4<br>[(1.25)-<br>(1.8)]        | 3.9<br>[(2.88)-<br>(4.85)]      | 5.8<br>[(4.5)-<br>(8.3)]        | 5.0<br>[(4.52)-<br>(5.38)]       | 2.2<br>[(0.75)-<br>(2.38)]       | 8.0<br>[(4.1)-<br>(8.95)]    |
| <b>APOE ε4 presence (%)</b>        | 55                            | 11.8                           | 16.7                            | 33.3                             | 75                              | 61.9                            | 50                               | 16.7                             | 0                            |
| <b>CSF Aβ<sub>42</sub> (pg/mL)</b> | 130.2<br>[(104)-<br>(151.6)]  | 199.9<br>[(171.5)-<br>(227.0)] | 164.0<br>[(132.5)-<br>(206.75)] | 269.7<br>[(236.76)-<br>(271.87)] | 186.1<br>[(157.7)-<br>(214.25)] | 139.9<br>[(123.17)-<br>(151)]   | 213.8<br>[(209.01)-<br>(218.53)] | 280.0<br>[(259.25)-<br>(314.25)] | 239.0<br>[(178.5)-<br>(252)] |
| <b>CSF t-tau (pg/mL)</b>           | 99.5<br>[(71.43)-<br>(152.5)] | 49.0<br>[(43.0)-<br>(63.6)]    | 40.9<br>[(24)-<br>(84.18)]      | 45.9<br>[(44.47)-<br>(52.69)]    | 66.2<br>[(57)-<br>(71.08)]      | 110.0<br>[(65.42)-<br>(133.71)] | 61.5<br>[(44.97)-<br>(77.96)]    | 36.0<br>[(30.75)-<br>(69.75)]    | 39.0<br>[(29.5)-<br>(77.5)]  |
| <b>CSF p-tau (pg/mL)</b>           | 27.98[(1<br>9.3)-<br>(41.76)] | 11.4<br>[(7.8)-<br>(13.5)]     | 17.81<br>[(13.2)-<br>(19.8)]    | 9.18<br>[(9.1)-<br>(16.8)]       | 25.91<br>[(19.4)-<br>(32.0)]    | 28.63[(1<br>3)-<br>(42.05)]     | 5.22<br>[(4.4)-<br>(6.0)]        | 8[(6.5)-<br>(9.5)]               | 9.6<br>[(6.2)-<br>(10.3)]    |

Data shown is median [(25<sup>th</sup> percentile)-(75<sup>th</sup> percentile)], except for Sex of subject and APOE ε4 presence. AD, Alzheimer disease; ALS, amyotrophic lateral sclerosis; FTLD, frontotemporal lobar degeneration; HC, healthy control with an unremarkable burden of any significant brain pathology; LRP, Lewy-related pathology; PD, Parkinson disease; TDP, TAR DNA-binding protein 43 (TDP-43) pathology .
